# Supplementary material for: Class XI Myosins Contribute to Auxin Response and Senescence-Induced Cell Death in Arabidopsis
Source: PubMed Central journal article supplement (PMC6277483; doi:10.3389/fpls.2018.01570), 2018-11-27

## *Supplementary Material*

# Class XI myosins contribute to auxin response and senescence-induced cell death in Arabidopsis

**Eve-Ly Ojangu\*, Birger Ilau, Krista Tanner, Kristiina Talts, Eliis Ihoma, Valerian V. Dolja, Heiti Paves, Erkki Truve**

\* **Correspondence:** Eve-Ly Ojangu: eve-ly.ojangu@ttu.ee

### 1 Supplementary Table

Supplementary Table S1. RT-qPCR primers.

| Gene name                             | AGI code  | Primer sequence                       |
|---------------------------------------|-----------|---------------------------------------|
| <i>SAND</i>                           | AT2G28390 | 5' - AACTCTATGCAGCATTGATCCACT - 3'    |
|                                       |           | 5' - TGATTGCATATCTTTATCGCCATC - 3'    |
| <i>UBC</i>                            | AT5G25760 | 5' - CTGCGACTCAGGGAATCTTCTAA - 3'     |
|                                       |           | 5' - TTGTGCCATTGAATTGAACCC - 3'       |
| expressed sequence<br>( <i>EX70</i> ) | AT2G32170 | 5' - ATCGAGCTAAGTTTGGAGGATGTAA - 3'   |
|                                       |           | 5' - TCTCGATCACAAACCCAAAATG - 3'      |
| <i>AUX1</i>                           | AT2G38120 | 5' - TGTTATCAGGAATAGTACTTCAGATC - 3'  |
|                                       |           | 5' - AGTATGAACCAAGTAATCCATCAAG - 3'   |
| <i>IAA2</i>                           | AT3G23030 | 5' - AGAACAACAACAGTGTGAGCTAC - 3'     |
|                                       |           | 5' - CTCTCACAATATTCACCAATCATGA - 3'   |
| <i>PIN1</i>                           | AT1G73590 | 5' - CGACTCCCAACACTCTAG - 3'          |
|                                       |           | 5' - AGCTTAGCTCCACGGTACTC - 3'        |
| <i>PIN3</i>                           | AT1G70940 | 5' - AAAGATTGGAAGATGAAGACAACCTTA - 3' |
|                                       |           | 5' - CTGGAACAAGGGAATATTCAAATC - 3'    |

|               |           |                                      |
|---------------|-----------|--------------------------------------|
| <i>PIN4</i>   | AT2G01420 | 5'- GGATCTTGTCTTCATTAGACGC - 3'      |
|               |           | 5'- GTATAAACCACTTAACTAGAAACTTCA - 3' |
| <i>PIN7</i>   | AT1G23080 | 5'- TCGCACTACCGATTACACTTGTT - 3'     |
|               |           | 5'- CATTTCGTGTTACATTACATTTTCTAG - 3' |
| <i>SAUR36</i> | AT2G45210 | 5'- GTGATTAGCATGGGGACACTTA - 3'      |
|               |           | 5'- ATCTTGAGTAGACCCATATAGAGAA - 3'   |
| <i>SAG12</i>  | AT5G45890 | 5'- TGATGAGCAAGCACTGATGAAG - 3'      |
|               |           | 5'- TTCGCCGTATCCAATCGCAG - 3'        |
| <i>SAG13</i>  | AT2G29350 | 5'- AGCTTGCCCACCCATTGTAAA - 3'       |
|               |           | 5'- CCAGCTGATTCATGGCTCCT - 3'        |

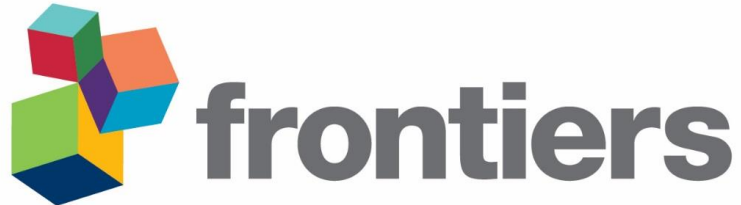

Supplement: Table_1.pdf [file Table_1.pdf]
