# Supplementary material for: Class XI Myosins Contribute to Auxin Response and Senescence-Induced Cell Death in Arabidopsis
Source: PubMed Central journal article supplement (PMC6277483; doi:10.3389/fpls.2018.01570), 2018-11-27

*Supplementary Material*

**Class XI myosins contribute to auxin response and senescence-induced cell death in Arabidopsis**

**Eve-Ly Ojangu\*, Birger Ilau, Krista Tanner, Kristiina Talts, Eliis Ihoma, Valerian V. Dolja, Heiti Paves, Erkki Truve**

\* **Correspondence:** Eve-Ly Ojangu: [eve-ly.ojangu@ttu.ee](mailto:eve-ly.ojangu@ttu.ee)

**1 Supplementary figure 1**

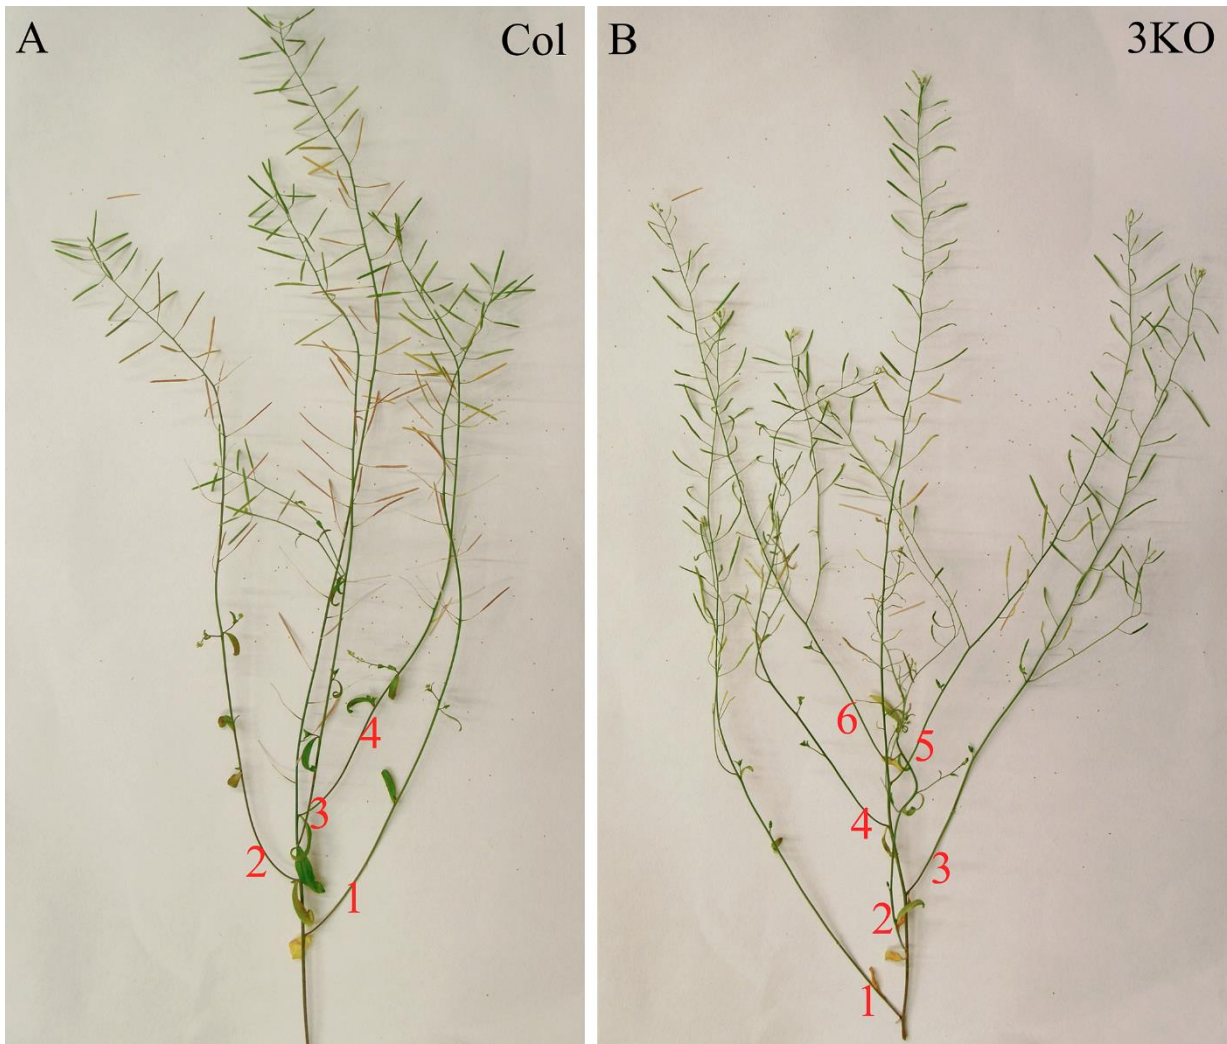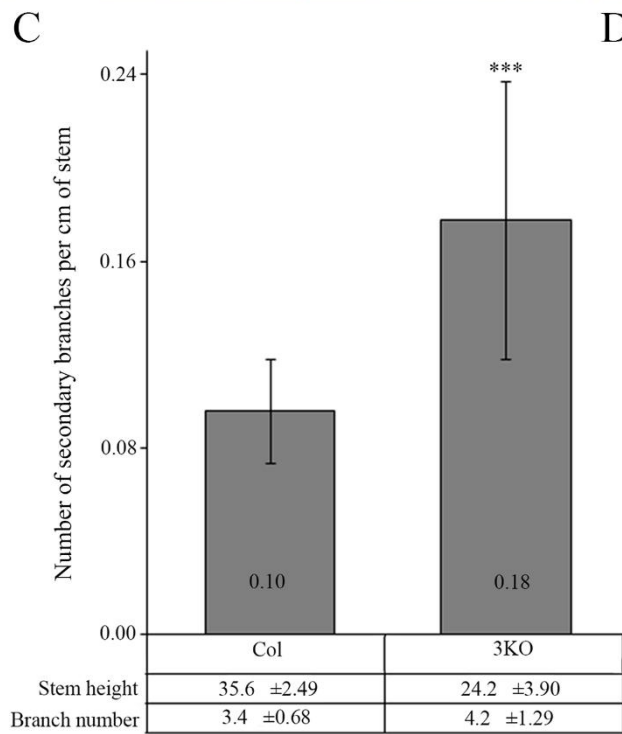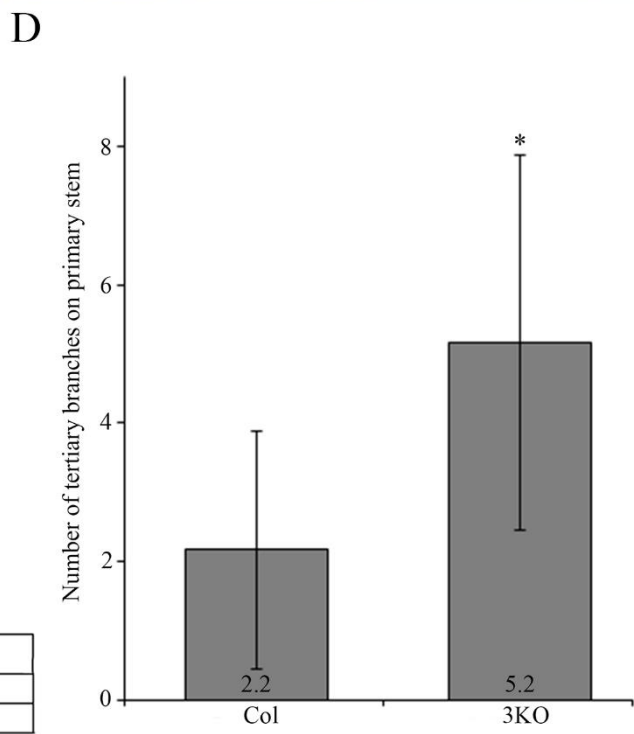

**Supplementary Figure 1. Branching architecture of primary inflorescence shoots.** (A) Primary inflorescence shoot of Col plant formed four axillary branches, and 3KO plant (B) six axillary branches. Red numbers illustrate the number of axillary branches. (C) Number of secondary branches per cm of primary inflorescence stem. Stem height and branch number was measured after flower formation was ended. Data represent average values; error bars represent SD;  $n = 17-19$ ; \*\*\*\*  $p < 0.001$  (Student's *t*-test). (D) Number of tertiary branches on primary inflorescence stem. Data represent average values; error bars represent SD;  $n = 6$ ; \*  $p < 0.05$  (Student's *t*-test).

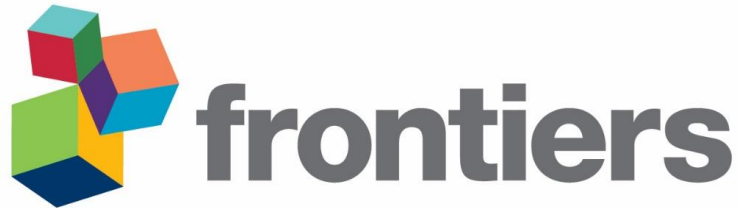

Supplement: Image_1.pdf [file Image_1.pdf]
