# Supplementary material for: Class XI Myosins Contribute to Auxin Response and Senescence-Induced Cell Death in Arabidopsis
Source: PubMed Central journal article supplement (PMC6277483; doi:10.3389/fpls.2018.01570), 2018-11-27

*Supplementary Material*

**Class XI myosins contribute to auxin response and senescence-induced cell death in Arabidopsis**

Eve-Ly Ojangu\*, Birger Ilau, Krista Tanner, Kristiina Talts, Eliis Ihoma, Valerian V. Dolja, Heiti Paves, Erkki Truve

\* Correspondence: Eve-Ly Ojangu: eve-ly.ojangu@ttu.ee

**1 Supplementary figure 2**

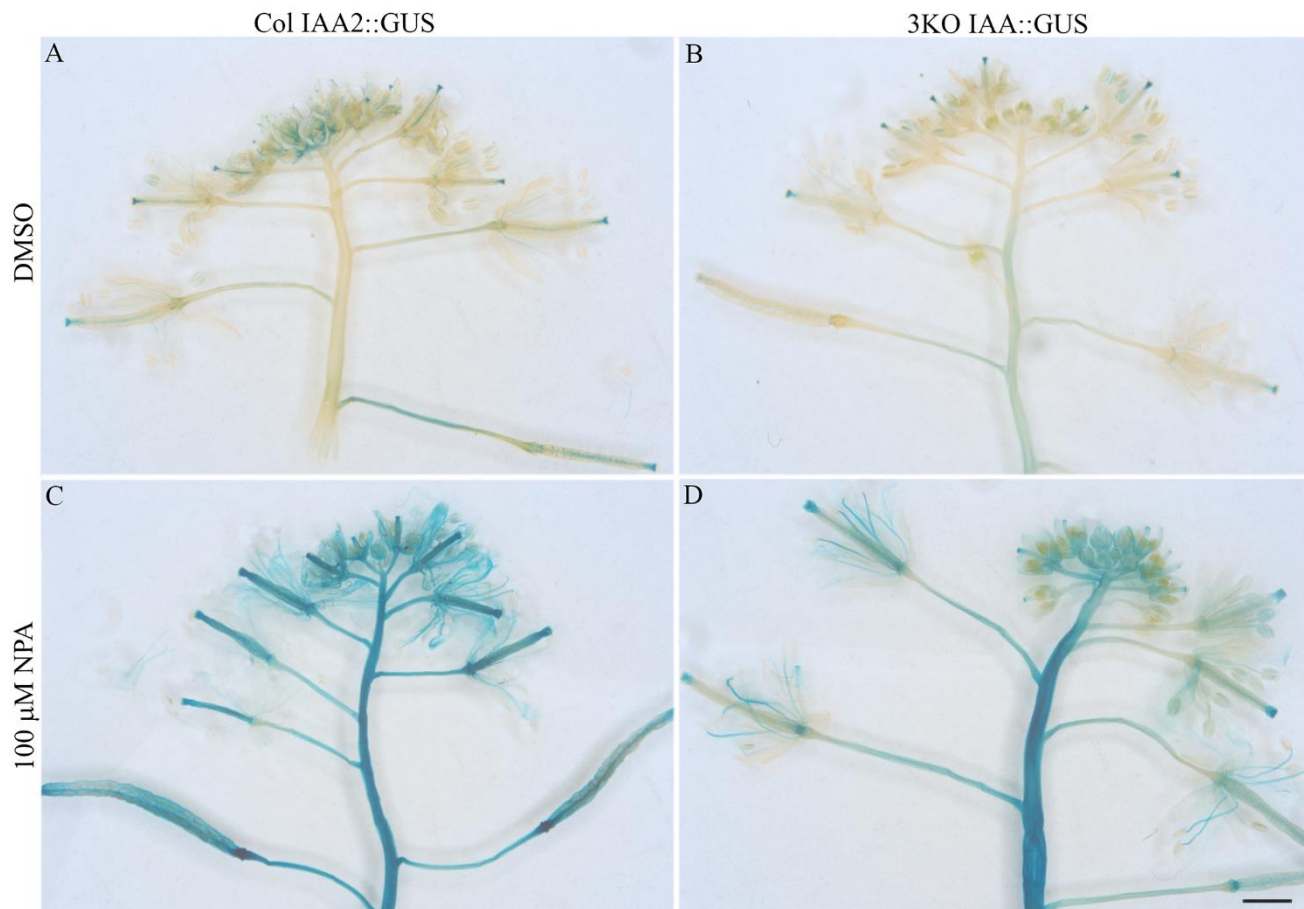

**Supplementary Figure 2. Effect of NPA-treatment on IAA2::GUS expression.** Primary inflorescences of Col IAA2::GUS (A) and 3KO IAA2::GUS (B) were dipped twice with 100  $\mu$ M NPA (C-D). Histochemical staining was performed one week after NPA-treatment. NPA-treatment led to

increased IAA2::GUS activity both in Col (C) and 3KO (D) inflorescences. In NPA-treated 3KO IAA2::GUS flowers, the GUS staining does not accumulate in valves of gynoecia. Somewhat weaker staining of pedicles, petals and sepals is noticeable in 3KO IAA2::GUS also. Scale bar is 1 mm.

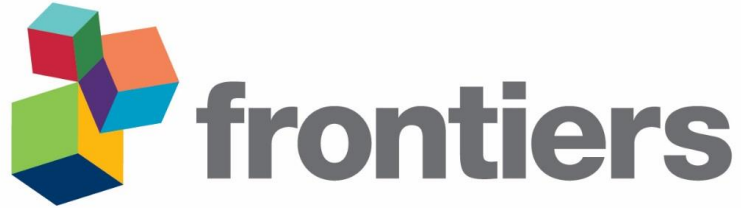

Supplement: Image_2.pdf [file Image_2.pdf]
