# Supplementary material for: Class XI Myosins Contribute to Auxin Response and Senescence-Induced Cell Death in Arabidopsis
Source: PubMed Central journal article supplement (PMC6277483; doi:10.3389/fpls.2018.01570), 2018-11-27

*Supplementary Material*

**Class XI myosins contribute to auxin response and senescence-induced cell death in Arabidopsis**

**Eve-Ly Ojangu\*, Birger Ilau, Krista Tanner, Kristiina Talts, Eliis Ihoma, Valerian V. Dolja, Heiti Paves, Erkki Truve**

\* **Correspondence:** Eve-Ly Ojangu: [eve-ly.ojangu@ttu.ee](mailto:eve-ly.ojangu@ttu.ee)

**1**    **Supplementary figure 3**

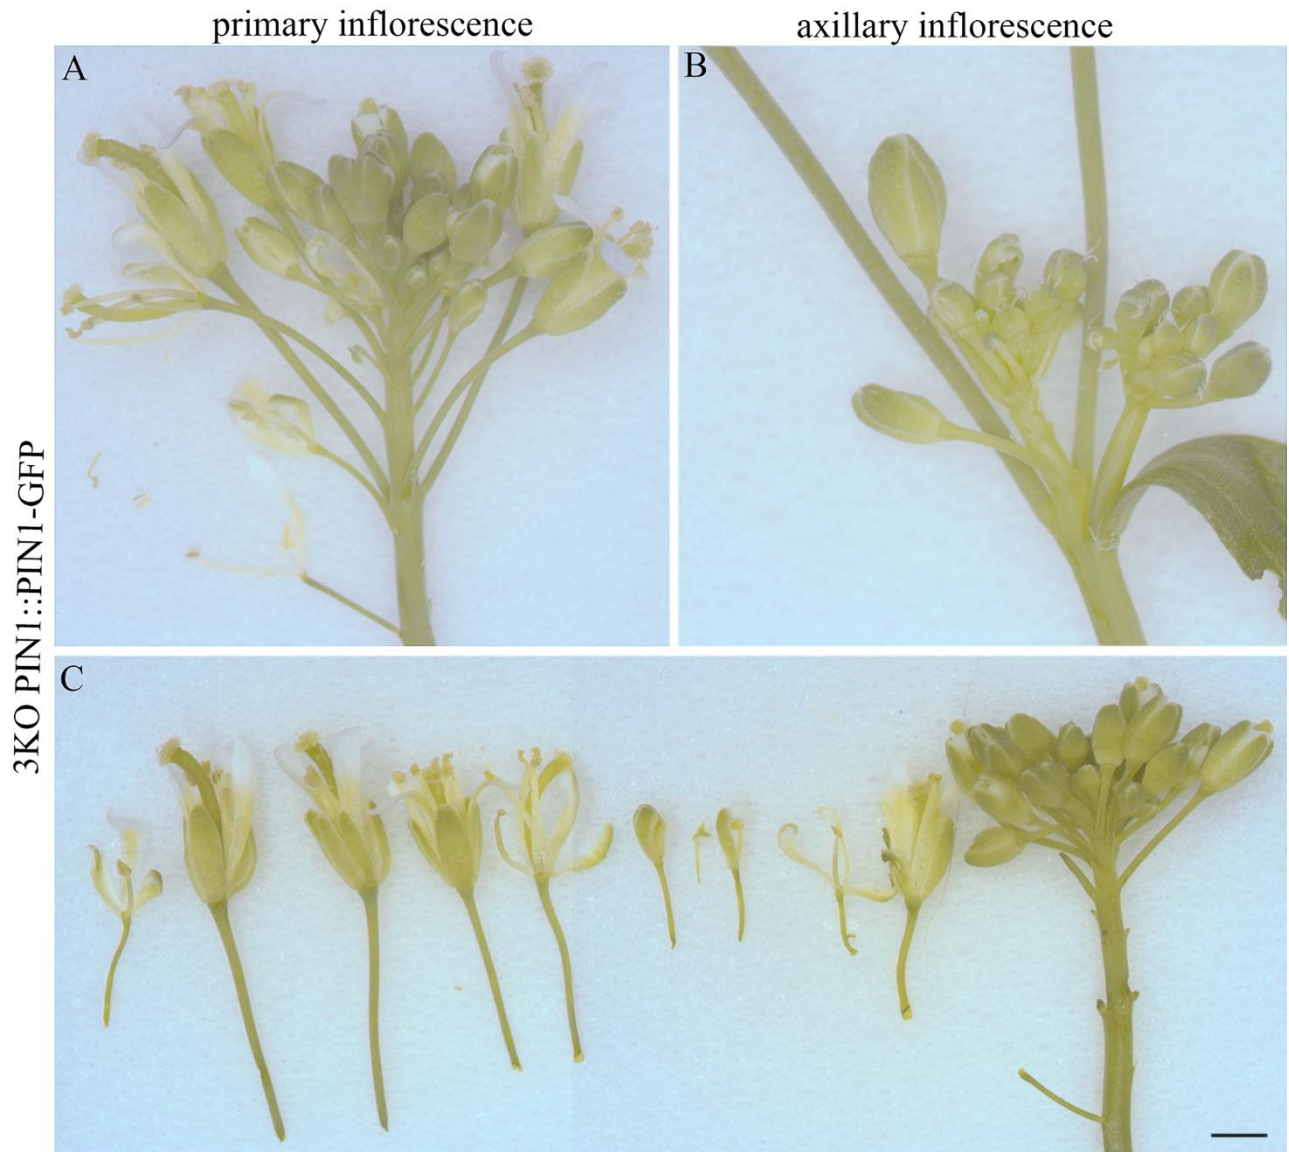

**Supplementary Figure 3. Variety of inflorescence and flower development in 3KO PIN1::PIN1-GFP plants.** The irregular architecture of (A) primary inflorescence and (B) axillary (secondary) inflorescence of 3KO PIN1::PIN1-GFP plants. (C) Post-anthesis flowers were dissected from primary inflorescence (A) according to developmental sequence. Notice the variability of under- and undeveloped flowers. Scale bar is 1mm.

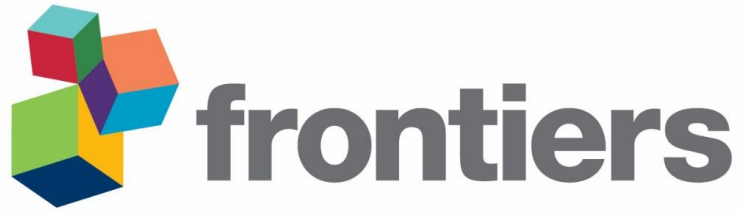

Supplement: Image_3.pdf [file Image_3.pdf]
