# Supplementary material for: Class XI Myosins Contribute to Auxin Response and Senescence-Induced Cell Death in Arabidopsis
Source: PubMed Central journal article supplement (PMC6277483; doi:10.3389/fpls.2018.01570), 2018-11-27

*Supplementary Material*

**Class XI myosins contribute to auxin response and senescence-induced cell death in Arabidopsis**

Eve-Ly Ojangu\*, Birger Ilau, Krista Tanner, Kristiina Talts, Eliis Ihoma, Valerian V. Dolja, Heiti Paves, Erkki Truve

\* Correspondence: Eve-Ly Ojangu: eve-ly.ojangu@ttu.ee

**1 Supplementary figure 5**

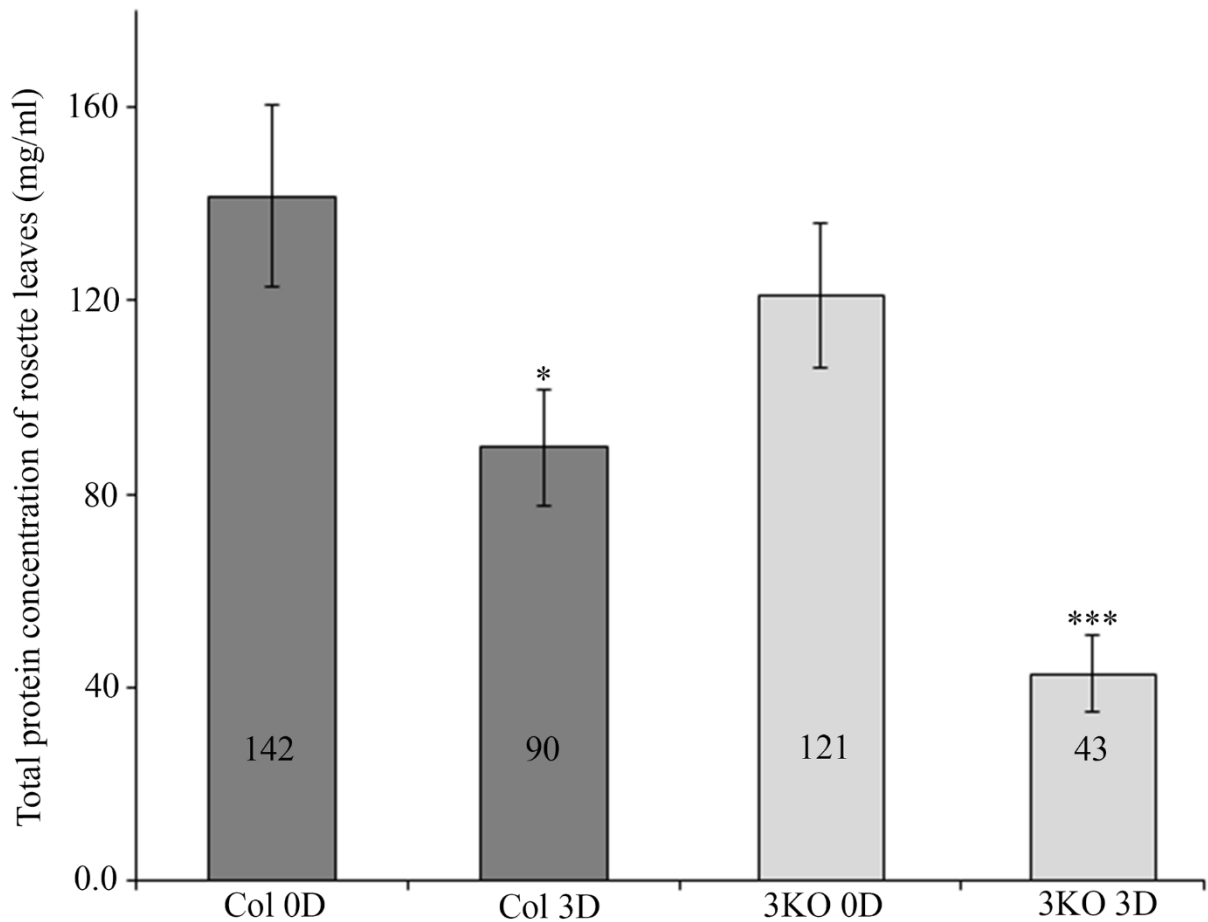

**Supplementary Figure 5. The total protein content of leaf extracts before and after dark treatment.** After dark-treatment, the total protein concentration of Col leaves was 1.6-fold lower (Col 3D) and the one of 3KO leaves was 2.8-fold lower (3KO 3D), in comparison with untreated controls

(Col 0D, 3KO 0D), respectively. Data represent average values; error bars represent SD;  $n = 4$ ; \*  $p < 0.05$ , \*\*\*  $p < 0.001$  (Student's  $t$ -test).

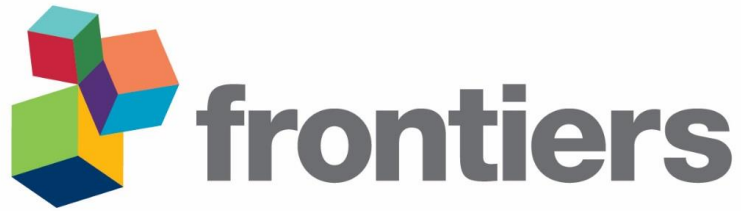

Supplement: Image_5.pdf [file Image_5.pdf]
